# Supplementary material for: Identifiers for the 21st century: How to design, provision, and reuse persistent identifiers to maximize utility and impact of life science data
Source: PubMed Central journal article supplement (PMC5490878; doi:10.1371/journal.pbio.2001414), 2017-06-29
Supplement: pbio.2001414.s002.pdf [file pbio.2001414.s002.pdf]

## S2 Table. Prefix and URI pattern registries

S2a Table. Formal registries

| Prefix registry             | Scope                               | Registration URL                                                                                                                              | Note                                                                                                                                                                    | Registers Native Prefix | Registers URI pattern | Functions as a resolver  |
|-----------------------------|-------------------------------------|-----------------------------------------------------------------------------------------------------------------------------------------------|-------------------------------------------------------------------------------------------------------------------------------------------------------------------------|-------------------------|-----------------------|--------------------------|
| Identifiers.org[1]          | Life sciences                       | <a href="https://sourceforge.net/p/identifiers-org/new-collection/">https://sourceforge.net/p/identifiers-org/new-collection/</a>             | Manually curated. Core OBO foundry namespaces are imported periodically.                                                                                                | yes                     | yes                   | yes                      |
| n2t.net[2]                  | Cross-domain Name-to-Thing resolver | <a href="http://n2t.net">http://n2t.net</a>                                                                                                   | Supports a combination of per-identifier and per-scheme (rule) redirects.                                                                                               | yes                     | yes                   | yes                      |
| Data Hub[3]                 | Cross-domain                        | <a href="http://datahub.io">http://datahub.io</a>                                                                                             | Datasets may be uploaded or registered for free. The Data Hub registry is used to populate the <a href="#">linked open data cloud</a> . [4]                             | yes                     | yes                   | no                       |
| OBO foundry[5]              | Bio-Ontologies                      | <a href="http://www.obofoundry.org/join.shtml">http://www.obofoundry.org/join.shtml</a>                                                       | Each ontology in OBO requires an "ID space" which is unique across all ontologies in OBO. Not all ontologies are eligible for inclusion.                                | yes ("ID space")        | no                    | yes, OBO PURL only       |
| Bioportal[6]                | Bio-Ontologies                      | <a href="http://bioportal.bioontology.org/login?redirect=/ontologies/new">http://bioportal.bioontology.org/login?redirect=/ontologies/new</a> | Each ontology in BioPortal requires a "Short ID" which is unique across all ontologies in BioPortal.                                                                    | yes ("Short ID")        | no                    | yes, Bioportal PURL only |
| Prefix.cc[7]                | Cross-domain                        | <a href="http://prefix.cc/">http://prefix.cc/</a>                                                                                             | Designed for Semantic Web practitioners. Accepts, short, memorable prefixes only, punctuation not allowed. Prefix assignments are ranked according to community voting. | yes                     | yes                   | no                       |
| Linked Open Vocabularies[8] | Cross-domain                        | <a href="http://lov.okfn.org/dataset/lov/">http://lov.okfn.org/dataset/lov/</a>                                                               | Designed for Semantic Web practitioners. Vocabularies relevant to linked data.                                                                                          | yes                     | yes                   | no                       |

S2b Table. Hybrid registries

There are other databases and web applications that leverage/mirror the prefixes/uri patterns served from the above registries, but that do not register any new ones themselves. This hybrid approach requires post-hoc coordination. The ongoing coordination and aggregation of information from various prefixing authorities is important to further minimize collisions.

| Prefix registry           | Scope                                             | Registration URL                                                                                                                                  | Note                                                                                                                 | Registers Native Prefix | Registers URI pattern | Functions as a resolver   |
|---------------------------|---------------------------------------------------|---------------------------------------------------------------------------------------------------------------------------------------------------|----------------------------------------------------------------------------------------------------------------------|-------------------------|-----------------------|---------------------------|
| Prefix Commons Biocontext | Primarily lifesciences                            | <a href="https://github.com/prefixcommons/biocontext/blob/master/README.md">https://github.com/prefixcommons/biocontext/blob/master/README.md</a> | Enables any registry or integrator to declare the mappings they issue and happen to use                              |                         |                       | no                        |
| Ontology Lookup Service   | Ontologies used by EMBL-EBI                       | n/a                                                                                                                                               | Scope is for ontologies used in molecular biology                                                                    | no                      | no                    | yes                       |
| BioSharing                | Life sciences - policies, standards and databases | <a href="https://www.biosharing.org/new/">https://www.biosharing.org/new/</a>                                                                     | Manually curated crowd-sourcing approach. Periodically synchronized with other sources such as Identifiers.org. Each | yes                     | no                    | yes, BioSharing PURL only |

|                               |                                                |                                                                                                                                                                                                |                                                                                                                                                 |     |     |                                       |
|-------------------------------|------------------------------------------------|------------------------------------------------------------------------------------------------------------------------------------------------------------------------------------------------|-------------------------------------------------------------------------------------------------------------------------------------------------|-----|-----|---------------------------------------|
|                               |                                                |                                                                                                                                                                                                | BioSharing record is registered with a short ID, which is unique across all of BioSharing.                                                      |     |     |                                       |
| Gene Ontology Prefix Registry | Identifiers that use GO or that are used by GO | <a href="https://github.com/geneontology/go-site/blob/master/metadata/db-xrefs.yaml">https://github.com/geneontology/go-site/blob/master/metadata/db-xrefs.yaml</a> (click on the 'edit' icon) | Manually curated YAML, managed in github. Pull requests accepted. Periodically manually synchronized with other sources such as Identifiers.org | yes | yes | Yes (in a limited context, eg. Amigo) |

1. Juty N, Le Novère N, Laibe C. Identifiers.org and MIRIAM Registry: community resources to provide persistent identification. *Nucleic Acids Res.* 2012;40: D580–6.
2. Wimalaratne S, Juty N, Kunze J, Janée G, McMurry JA, Beard N, et al. Uniform Resolution of Compact Identifiers for Biomedical Data [Internet]. *bioRxiv.* 2017. p. 101279. doi:10.1101/101279
3. Welcome - the Datahub [Internet]. [cited 6 Mar 2017]. Available: <http://datahub.io>
4. Cyganiak R, Jentzsch A. Linking open data cloud diagram. *LOD Community* (<http://lod-cloud.net/>). 2011;12. Available: <http://lod-cloud.net/>
5. Smith B, Ashburner M, Rosse C, Bard J, Bug W, Ceusters W, et al. The OBO Foundry: coordinated evolution of ontologies to support biomedical data integration. *Nat Biotechnol.* 2007;25: 1251–1255.
6. Whetzel PL, Noy NF, Shah NH, Alexander PR, Nyulas C, Tudorache T, et al. BioPortal: enhanced functionality via new Web services from the National Center for Biomedical Ontology to access and use ontologies in software applications. *Nucleic Acids Res.* 2011;39: W541–5.
7. namespace lookup for RDF developers | [prefix.cc](http://prefix.cc) [Internet]. [cited 6 Mar 2017]. Available: <http://prefix.cc>
8. Vandebussche P-Y, Atemezing GA, Poveda-Villalón M, Vatant B. Linked Open Vocabularies (LOV): a gateway to reusable semantic vocabularies on the Web. *Semantic Web. IOS Press;* 2017;8: 437–452.
