# Supplementary material for: Identifiers for the 21st century: How to design, provision, and reuse persistent identifiers to maximize utility and impact of life science data
Source: PubMed Central journal article supplement (PMC5490878; doi:10.1371/journal.pbio.2001414), 2017-06-29
Supplement: pbio.2001414.s003.pdf [file pbio.2001414.s003.pdf]

**S3 Table. Questions that good identifier documentation should answer**

| Scope                  | Question to answer                                                                                                                                                                                                                                             | Recommendation       |
|------------------------|----------------------------------------------------------------------------------------------------------------------------------------------------------------------------------------------------------------------------------------------------------------|----------------------|
| Provider               | What types of entities are identified, what is the scope of these entities?*                                                                                                                                                                                   | Must include         |
| Provider               | What is your primary URI pattern, if only one exists? If multiple, equally-valid URI patterns co-exist, what are these?<br>(e.g. INSDC.org has four such schemes as the entire dataset is fully represented by each of three authorities: NCBI, ENA, and DDBJ) | Must include         |
| Provider               | Are you aware of any alternate URIs (eg. different resolvers) that other groups use for your identifiers? (Even though alternates are not recommended for use, knowing what which URIs are equivalent facilitates data integration.)                           | Could include        |
| Provider               | What is the prefix you wish others to use if they reference your entities in an abbreviated way? If this prefix is registered, where? What is the compact URI you wish others to use?***                                                                       | Must include         |
| Provider               | What is your persistence policy regarding maintenance of the URIs? What is your persistence policy regarding the corresponding entities and metadata?                                                                                                          | Must include         |
| Provider               | Can machine-readable representations of your entities be accessed? If so, where and in what formats?                                                                                                                                                           | Must include         |
| Provider               | What is the regular expression of your Local IDs and URIs? What do your identifiers look like. If possible provide a strict pattern to describe these identifiers.                                                                                             | Must include         |
| Provider               | Are there relationships between your identifiers? Where are these described?*                                                                                                                                                                                  | Should include       |
| Provider               | Under what license are identifiers made available?                                                                                                                                                                                                             | Should include       |
| Provider               | Does the lifecycle of the entities potentially include versioning, splitting, merging, or deprecation? How are these changes managed, communicated, and synchronized between those using that entity?*                                                         | Must include         |
| Provider-Redistributor | Do you identify <i>entities</i> that are also identified by others? Who are these others? Where are these mappings found and who, if anyone, maintains them?                                                                                                   | Strongly recommended |
| Provider-Redistributor | Do you reference <i>identifiers</i> that are issued by other authorities? If so, in what cases? How often are the identifiers synchronized?                                                                                                                    | Must include         |
| Provider-Redistributor | If you reference <i>identifiers</i> that are issued by other authorities, what are the mappings used for prefix-to-URI patterns? What is the source of these mappings (e.g. manual or identifier service). Where can your mappings be found?                   | Must include         |

\* Adapted from the Linked open data institute recommendations [LODI]

\*\*If your Local IDs already have a colon, make it clear to users what your preferred corresponding compact URI syntax is. We recommend referencing the LRI as if it were already a compact URI. For instance, the case of GO:0007049, the prefix 'GO' can be expanded to [http://purl.obolibrary.org/obo/GO\\_](http://purl.obolibrary.org/obo/GO_) and prepended to the numeric fragment to yield [http://purl.obolibrary.org/obo/GO\\_0007049](http://purl.obolibrary.org/obo/GO_0007049), in accordance with their documentation.
