# Supplementary material for: Identifiers for the 21st century: How to design, provision, and reuse persistent identifiers to maximize utility and impact of life science data
Source: PubMed Central journal article supplement (PMC5490878; doi:10.1371/journal.pbio.2001414), 2017-06-29
Supplement: pbio.2001414.s006.pdf [file pbio.2001414.s006.pdf]

### S3 Text. Things to consider when choosing a resolver approach

There are basically three kinds of approaches to serving URIs on the web: (a) “native” URIs that require no redirection at all (as in Fig. 1, ZFIN). (b) “in house” URIs that redirect internally (as in Fig. 1, Ensembl); and (c) schemes using an external resolving authority (as in Fig. 1, Biosamples). Representative resolver authorities that meet the JDDCP (<https://www.force11.org/datacitation>, [1]) criteria are e.g. DOI (DataCite[2], CrossRef[3]), Identifiers.org[4], Handle.net[5], PURL[6], EPIC[7], N2T[8] and NBN[9]; these are described in Starr et al[10]. Additional resolver authorities that meet the criteria but which are not described therein are EPIC[11] and w3id[12]. Note that PURLs under the authority of PURL.org had gone into read-only mode and were therefore no longer adherent to the JDDCP principles; however, the InternetArchive[13] has assumed responsibility for them as of September 2016[14].

Below are some additional criteria you may want to consider in choosing one of these resolvers.

- Does the resolver retain the native Local Resource Identifier that you issue (eg. identifiers.org, n2t.net), or does it instead issue a new one? (eg. DOI).
  - If the resolver *does* issue a new identifier, what is the typical turnaround time between request and fulfilment? Can you obtain an identifier before you yourself need to use it?
- Would you or your institution need to pay fixed/variable costs to have your identifiers resolved? If the service is free for those that need their identifiers resolved, who pays to maintain the service?
- Is the service capable of issuing and managing identifiers in the kinds of volume you would require?
- Change management policy
  - Will you need to change the data which is referenced by the URI, and if so does the resolving system under consideration permit such change?
  - Is the object to which the URI resolves allowed to be removed?
  - Does the resolver support numerical suffixing for versions of the LRI?
  - If new LRIs are issued for each version of an entity, how can versions be related to each other?
- Will you require the resolver to support multiple resolving locations (mirrors)?
- Does the resolver support content negotiation at resolver’s HTTP URI?
- Does the resolver collect, index, and/or curate metadata about individual entities?
  - If so, is the metadata that is collected relevant for the types of entities identified?
- Does the resolver collect, index, and/or curate metadata about collections of entities (e.g. whole databases)?
  - If so, is the metadata that is collected relevant for the type of collection?
- Does the resolver support controlled access for confidential data?
- Is the resolver cross-discipline?

1. Joint Declaration of Data Citation Principles - FINAL. In: FORCE11 [Internet]. 30 Oct 2013 [cited 6 Mar 2017]. Available: <https://www.force11.org/datacitation>
2. DataCite Team. Welcome to DataCite [Internet]. [cited 6 Mar 2017]. Available: <https://www.datacite.org>
3. Crossref team. Metadata enables connections - Crossref. In: [www.crossref.org](http://www.crossref.org) [Internet]. [cited 6 Mar 2017]. Available: <http://www.crossref.org/>
4. EMBL-EBI. Identifiers.org < EMBL-EBI [Internet]. [cited 6 Mar 2017]. Available: <http://identifiers.org/>
5. Handle.Net Registry [Internet]. [cited 6 Mar 2017]. Available: <http://handle.net/>
6. PURL Administration [Internet]. [cited 6 Mar 2017]. Available: <https://archive.org/services/purl/>
7. Persistent Identifiers for eResearch [Internet]. [cited 6 Mar 2017]. Available: <http://www.pidconsortium.eu/>

8. Name-to-Thing (N2T) Identifier Resolver Home Page [Internet]. [cited 6 Mar 2017]. Available: <http://n2t.net/>
9. BioModels.net team. MIRIAM Registry [Internet]. [cited 6 Mar 2017]. Available: <http://identifiers.org/nbn/>
10. Starr J, Castro E, Crosas M, Dumontier M, Downs RR, Duerr R, et al. Achieving human and machine accessibility of cited data in scholarly publications. PeerJ Comput Sci. 2015;1. doi:10.7717/peerj-cs.1
11. Persistent Identifiers for eResearch [Internet]. [cited 6 Mar 2017]. Available: <http://www.pidconsortium.eu/>
12. w3id.org - Permanent Identifiers for the Web [Internet]. [cited 6 Mar 2017]. Available: <https://w3id.org/>
13. Internet Archive: Digital Library of Free Books, Movies, Music & Wayback Machine [Internet]. [cited 6 Mar 2017]. Available: <https://archive.org/>
14. Graham M. Persistent URL Service, purl.org, Now Run by the Internet Archive | Internet Archive Blogs [Internet]. [cited 6 Mar 2017]. Available: <https://blog.archive.org/2016/09/27/persistent-url-service-purl-org-now-run-by-the-internet-archive/>
